# Supplementary material
Source: PubMed Central journal article supplement (PMC5912992)
Supplement: NIHMS943331-supplement-Supp_info.pdf [file NIHMS943331-supplement-Supp_info.pdf]

## Supporting Information

We list the Protein Databank codes for each protein used in our studies. Table S1 lists the 182 proteins selected from the Dunbrack 1.0 Å database that comprise the Dun1.0 dataset used in our studies. (Proteins with ligands and modified residues were removed from the dataset.) Table S2 lists the 149 protein-protein complexes in the PPI dataset. Table S3 contains the 19 transmembrane proteins in the TM dataset.

In Fig. S1, we show the relationship between the prediction accuracy (using the hard-sphere model) and relative solvent accessible surface area, rSASA, for the Ile, Leu, Phe, Ser, Thr, Trp, Tyr and Val residues in the Dun1.0 database. We find that for all residues (except Ser) the prediction accuracy decreases as rSASA increases.

Table S1: Protein Databank codes for each protein in Dun1.0

|      |      |      |      |      |      |
|------|------|------|------|------|------|
| 1A6M | 1N4W | 1ZK4 | 2JHF | 3DHA | 3SOJ |
| 1AHO | 1NKI | 1ZLB | 2O9S | 3DK9 | 3TEU |
| 1BYI | 1NLS | 1ZUU | 2OV0 | 3E4G | 3U7Q |
| 1C75 | 1NQJ | 1ZZK | 2P5K | 3EA6 | 3UI4 |
| 1C7K | 1NWZ | 2A6Z | 2PND | 3FIL | 3V1A |
| 1EB6 | 1O7J | 2B97 | 2PNE | 3FSA | 3VII |
| 1EXR | 1OAI | 2BF6 | 2PWA | 3FYM | 3VOR |
| 1F94 | 1OD3 | 2BT9 | 2QCP | 3G21 | 3VRC |
| 1G4I | 1OK0 | 2BW4 | 2QSK | 3G46 | 3ZR8 |
| 1G66 | 1P1X | 2CE2 | 2QXI | 3GOE | 3ZSJ |
| 1G6X | 1PQ7 | 2CHH | 2R31 | 3H31 | 3ZUC |
| 1GCI | 1Q6Z | 2CWS | 2RBK | 3HGP | 3ZZP |
| 1GQV | 1R6J | 2DDX | 2RH2 | 3IP0 | 4A02 |
| 1GWE | 1RTQ | 2DSX | 2V8T | 3JU4 | 4A7U |
| 1IQZ | 1TG0 | 2E4T | 2VB1 | 3JUD | 4ACJ |
| 1IX9 | 1TQG | 2ERL | 2VHA | 3JYO | 4AR5 |
| 1IXH | 1TT8 | 2F01 | 2VHK | 3KFF | 4AXO |
| 1J0P | 1U2H | 2FDN | 2VXN | 3KLR | 4AYO |
| 1JFB | 1UCS | 2FMA | 2XFR | 3KS3 | 4DPB |
| 1K4I | 1UFY | 2FVY | 2XJP | 3M5Q | 4EA9 |
| 1K5C | 1UG6 | 2FWH | 2XOD | 3NE0 | 4EGU |
| 1KTH | 1US0 | 2G6F | 2XOM | 3NIR | 4F1V |
| 1KWF | 1V0L | 2GGC | 2XU3 | 3NOQ | 4G9S |
| 1L9L | 1V6P | 2GKG | 2Y78 | 3O4P | 4GA2 |
| 1LNI | 1VBW | 2H3L | 3A02 | 3O5Q | 4HNO |
| 1M1Q | 1VYR | 2H5C | 3A38 | 3PSM | 4I8H |

|      |      |      |      |      |      |
|------|------|------|------|------|------|
| 1M40 | 1W0N | 2HS1 | 3A4R | 3PUC | 7A3H |
| 1MC2 | 1X6Z | 2I4A | 3AGN | 3Q46 |      |
| 1MJ5 | 1X8Q | 2IIM | 3AJ4 | 3QR7 |      |
| 1MN8 | 1XMK | 2IXT | 3BWH | 3RQ9 |      |
| 1MUW | 1Y55 | 2JFR | 3CCD | 3RWN |      |

Table S2: Protein Databank codes for each protein in PPI

|      |      |      |      |      |      |
|------|------|------|------|------|------|
| 1AAP | 1U07 | 2H2R | 3KGK | 4J78 | 4YNH |
| 1CKA | 1UTI | 2HQX | 3KTP | 4JVU | 4Z27 |
| 1D4T | 1UZ3 | 2IPR | 3L32 | 4K12 | 4Z8J |
| 1DJT | 1V8H | 2OEI | 3M8J | 4K5A | 4ZGW |
| 1DQZ | 1VH5 | 2PKF | 3MAB | 4K8Y | 5B08 |
| 1EZG | 1W5R | 2PV1 | 3NDD | 4KN8 | 5C04 |
| 1F46 | 1WMH | 2Q20 | 3NSO | 4LEB | 5D38 |
| 1G2Q | 1X2I | 2R1U | 3OBQ | 4LLD | 5DDZ |
| 1IJY | 1X6I | 2W2A | 3PSM | 4LN2 | 5DWP |
| 1IRQ | 1ZRS | 2W6A | 3PTL | 4LNP | 5EPW |
| 1KTN | 2A35 | 2XHF | 3RQ9 | 4M91 | 5GT5 |
| 1KYF | 2A8F | 3AZD | 3SO6 | 4NPU | 5GTU |
| 1MFG | 2AB0 | 3BZZ | 3SR3 | 4OHJ | 5HEY |
| 1MKK | 2BPD | 3C8P | 3VZ9 | 4ONL | 5HHE |
| 1MTP | 2C61 | 3CT6 | 3ZIT | 4P61 | 5IMM |
| 1MY7 | 2CAR | 3CZZ | 3ZRX | 4PRS | 5J4F |
| 1NXM | 2DPL | 3DRF | 4AVR | 4Q9B | 5K2I |
| 1OAI | 2E10 | 3DS2 | 4C18 | 4QLP | 5K3D |
| 1QKD | 2ETX | 3FIL | 4DO2 | 4RDJ | 5KWN |
| 1SH8 | 2FHZ | 3F1P | 4ERY | 4UU3 | 5LND |
| 1SQE | 2FLU | 3G1S | 4FZO | 4UUL | 5N8A |
| 1SSH | 2GEC | 3GMG | 4G6C | 4WJO | 5TZ5 |
| 1T6F | 2GOM | 3HJ2 | 4G7X | 4WW1 | 5XAV |
| 1T7H | 2GRR | 3I2Z | 4IHE | 4X9Z | 5XN3 |
| 1TVN | 2GU9 | 3IVV | 4IHN | 4XO9 |      |

Table S3: Protein Databank codes for each protein in TM

|      |      |      |      |      |
|------|------|------|------|------|
| 1Q16 | 2SQC | 3LDC | 3V5U | 4Y9H |
| 1U7G | 2XOV | 3M7L | 3WG7 | 5AEZ |
| 2A65 | 3B9W | 3PCV | 4AL0 | 5G28 |
| 2O4V | 3GD8 | 3S8G | 4EIY |      |

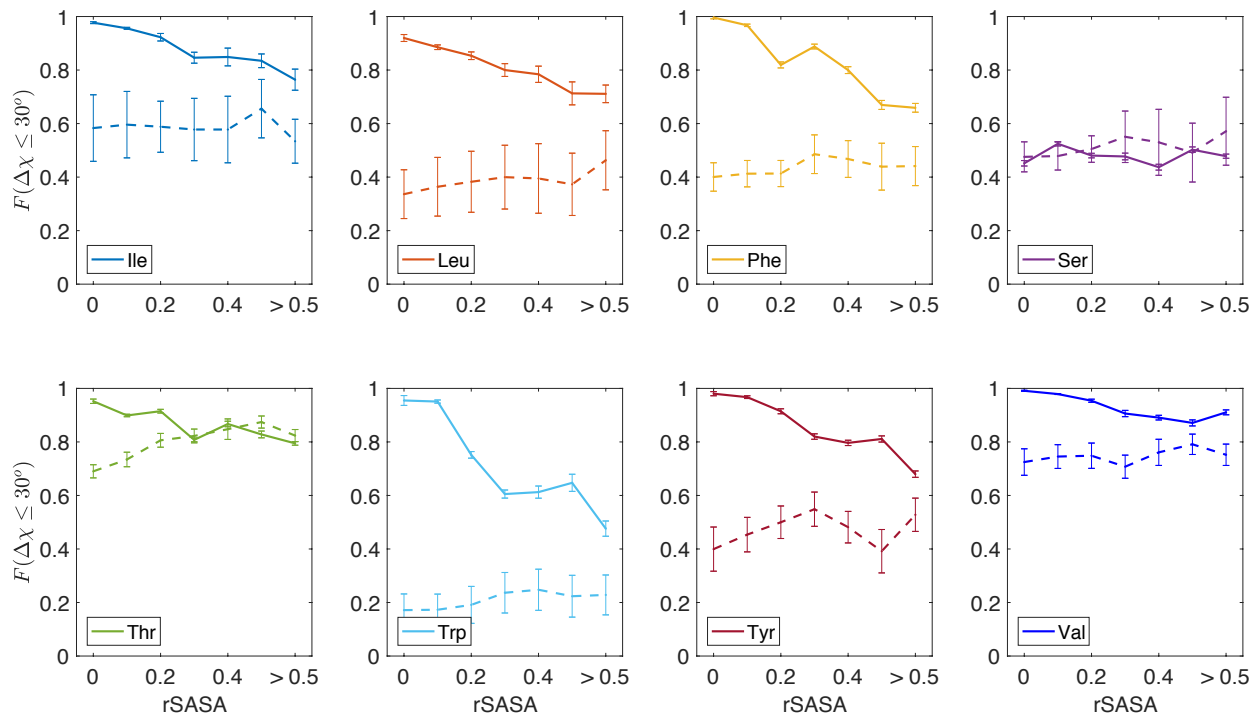

Figure S1: Fraction of residues predicted (using the hard-sphere model) within  $30^\circ$ ,  $F(\Delta\chi \leq 30^\circ)$ , for Ile, Leu, Phe, Ser, Thr, Trp, Tyr, and Val residues in the Dun1.0 database (solid line) and their corresponding dipeptide mimetics (dotted line) as a function of rSASA. The dotted line provides lower bounds for the prediction accuracy for the residues in each rSASA bin. Due to the low frequency of uncharged residues in the non-core region, we have combined all residues with rSASA > 0.5 into one bin.
